# Supplementary material for: Heteroepitaxial film silicon solar cell grown on Ni-W foils
Source: Royal Society of Chemistry journal article supplement (doi:10.1039/c2ee03350j), 2012-01-01
Supplement: c2ee03350j.pdf [file c2ee03350j.pdf]

## Electronic Supplementary Information for

### **Heteroepitaxial film silicon solar cell grown on Ni-W foils**

Sung Hun Wee,<sup>a</sup> Claudia Cantoni,<sup>a</sup> Thomas R. Fanning,<sup>b</sup> Charles W. Teplin,<sup>c</sup> Daniela F. Bogorin,<sup>a</sup>  
Jon Bornstein,<sup>b</sup> Karen Bowers,<sup>b</sup> Paul Schroeter,<sup>b</sup> Falah Hasoon,<sup>c</sup> Howard M. Branz,<sup>c</sup> M. Parans  
Paranthaman,<sup>a</sup> and Amit Goyal<sup>a</sup>

<sup>a</sup>*Oak Ridge National Laboratory, Oak Ridge, TN 37831, USA*

<sup>b</sup>*Ampulse Corporation, Golden, CO 80401, USA*

<sup>c</sup>*National Renewable Energy Laboratory, Golden, CO 80401, USA*

### Numerical method for determining % cube of a cube-textured material

A (111) pole figure of a cube-textured material has four peaks:

$$\psi_1 = 54.7^\circ, \phi_1 = 45^\circ$$

$$\psi_2 = 54.7^\circ, \phi_2 = 135^\circ$$

$$\psi_3 = 54.7^\circ, \phi_3 = 225^\circ$$

$$\psi_4 = 54.7^\circ, \phi_4 = 315^\circ$$

The total intensity in a pole figure is

$$I_{\text{total}} = \int_0^{\pi/2} d\psi \int_0^{\pi/2} d\phi \sin \psi I(\psi, \phi).$$

The cube-textured intensity is

$$I_{\text{cube}} = \sum_{i=1}^4 \int_0^{\pi/2} d\psi \int_0^{\pi/2} d\phi \sin \psi I(\psi, \phi) N(\psi - \psi_i, \phi - \phi_i),$$

where,

$$N(\Delta\psi, \Delta\phi) = 1 \text{ if } \sqrt{\Delta\psi^2 + \Delta\phi^2} < W$$

$$N(\Delta\psi, \Delta\phi) = 0 \text{ otherwise.}$$

We set  $W = 15^\circ$ .

The cube fraction is  $I_{\text{cube}}/I_{\text{total}} \times 100$  (%).

**Table S1.** Lattice mismatches between layers with and without 45° rotation of basal plane.

| Interface                                     | $\epsilon_s$<br>without rotation | $\epsilon_s$<br>with rotation | Experimental rotation |
|-----------------------------------------------|----------------------------------|-------------------------------|-----------------------|
| NiW/Y <sub>2</sub> O <sub>3</sub>             | 50.4%                            | 6.4%                          | 45°                   |
| Y <sub>2</sub> O <sub>3</sub> /YSZ            | 2.9%                             | 31.3%                         | None                  |
| YSZ/CeO <sub>2</sub>                          | 5.1%                             | 25.7%                         | None                  |
| CeO <sub>2</sub> /STO                         | 27.8%                            | 2.1%                          | 45°                   |
| STO/ $\gamma$ -Al <sub>2</sub> O <sub>3</sub> | 1.7%                             | 43.9%                         | None                  |
| $\gamma$ -Al <sub>2</sub> O <sub>3</sub> /Si  | 36.7%                            | 3.3%                          | 45°                   |

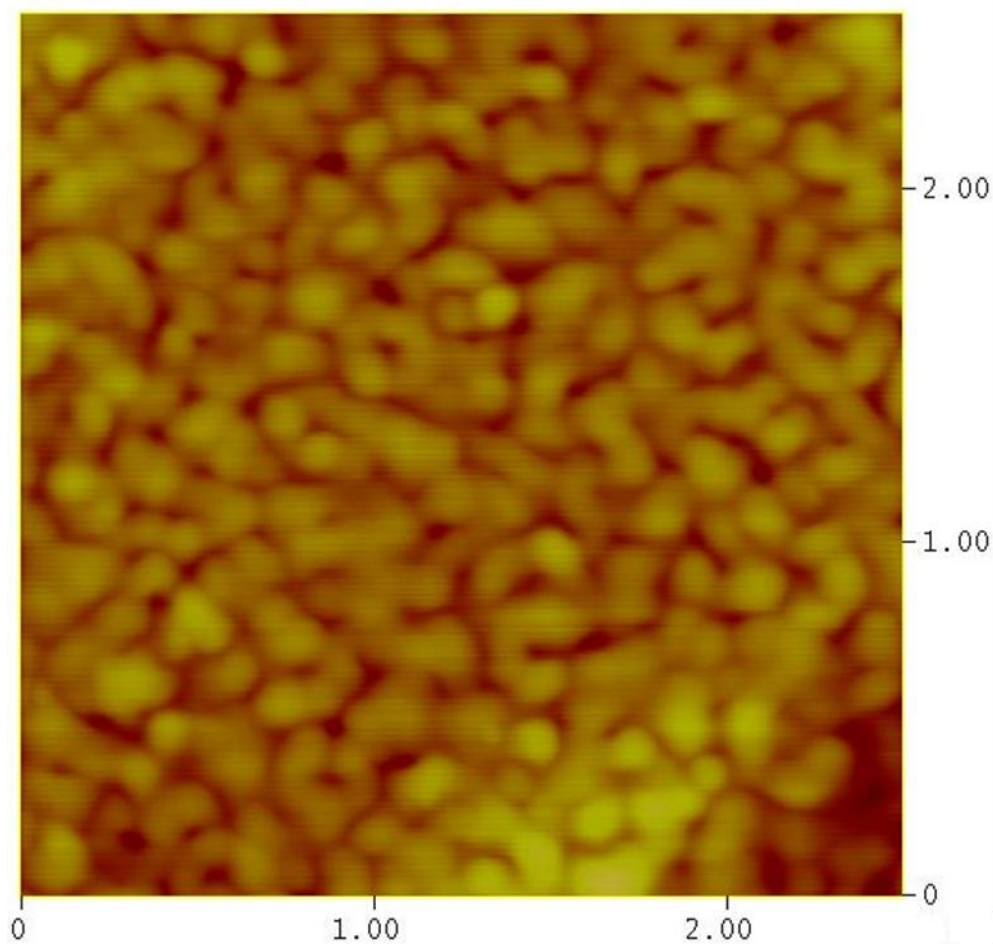

**Figure S1.** AFM image ( $2.5 \times 2.5 \mu\text{m}^2$ ) for  $\gamma\text{-Al}_2\text{O}_3$  top layer (100 nm) on STO (100 nm) /  $\text{CeO}_2$  (60 nm) / YSZ (100 nm) /  $\text{Y}_2\text{O}_3$  (80 nm) / Ni-5 at.% W (50  $\mu\text{m}$ ). The RMS surface roughness is measured to have 3.26 nm.
